# Supplementary material for: Alterations of Gut Microbiota in Cholestatic Infants and Their Correlation With Hepatic Function
Source: Front Microbiol. 2018 Nov 13;9:2682. doi: 10.3389/fmicb.2018.02682 (PMC6243132; doi:10.3389/fmicb.2018.02682)
Supplement: TABLE S1 — Detailed background information of the participants. [file Table_1.XLSX]

## Sheet: Table 1
Detailed background information of the participants
Sample ID	Gender	Age (mo)	Delivery Pattern	Feeding Pattern	TBIL (3-20 umol/L)	DBIL (2-6 umol/L)	ALT (5-40 U/L)	AST (5-35 U/L)	GGT (7-40 U/L)	TBA (1-10 umol/L)	TP (60-80 g/L)	CHOL (0-5.2 mmol/L)	Clinical diagnosis
IC1	Male	1.9	Cesarean section	Breastfeeding	167.45	74.5	22	64	257	217.7	50	4.81	-
IC2	Male	2.7	Cesarean section	Mixed	86.54	40.8	132	178	74	121.1	63.2	3.33	-
IC3	Female	3	Natural delivery	Breastfeeding	118.3	90.4	182	167	364	33.8	56.6	2.87	-
IC4	Female	1	Natural delivery	Breastfeeding	98.9	72.6	39	74	81	65.4	55.5	3.24	-
IC5	Female	1.5	Cesarean section	Mixed	4.52	1	951.8	700.5	324	3.2	72.8	3.15	-
IC6	Male	1	Natural delivery	Formula feeding	314.2	190.4	68.5	165	177	500.6	46.3	3.89	-
IC7	Male	2.1	Natural delivery	Breastfeeding	93.8	56.1	1799	1833	305	226.6	59	3.4	-
IC8	Male	0.6	Natural delivery	Breastfeeding	230.84	171.94	191	173	439	55.4	41	7.19	-
IC9	Male	0.8	Cesarean section	Breastfeeding	191.8	162.8	287	381	115	105.3	43.5	2.92	Biliary atresia
IC10	Female	1	Natural delivery	Breastfeeding	173.4	139.2	139	156	490	62.1	45	2.8	Biliary atresia
IC11	Male	2	Cesarean section	Formula feeding	164.7	117.07	115.9	194.1	105.3	58.1	49.7	2.77	-
IC12	Male	11	Cesarean section	Breastfeeding	55	34.1	106	171	39	145.8	56	3.17	Cytomegalovirus hepatitis
IC13	Male	1	Natural delivery	Mixed	325	62.5	40	40	151	5.7	46.1	3.4	-
IC14	Male	2	Natural delivery	Formula feeding	280.2	145.56	104	150	62.7	125.7	68.9	4.69	-
IC15	Male	1.6	Natural delivery	Formula feeding	203.7	155.2	86.9	106	101	96.6	51.2	3.39	-
IC16	Female	5	Natural delivery	Breastfeeding	171.6	103.6	67	173	145	151.4	40	3.98	Biliary atresia
IC17	Male	2	Natural delivery	Breastfeeding	238.6	155.6	631	809	60	117.6	57	4.55	-
IC18	Female	1	Cesarean section	Formula feeding	214.89	113.5	341	370	71	111.7	55.2	3.04	Biliary atresia
IC19	Female	0.7	Cesarean section	Breastfeeding	142	115.6	142	212	762	164.7	57.1	3.65	Biliary atresia
IC20	Female	4.5	Cesarean section	Formula feeding	243.4	122.7	244	739	40	148.9	49.3	2.41	-
IC21	Male	2.5	Cesarean section	Breastfeeding	159.6	122.3	95	107	251	109.3	52.9	3.19	Biliary atresia
IC22	Male	1.8	Cesarean section	Formula feeding	109	81.3	122.5	240.1	602	63.2	58.7	3.02	Cytomegalovirus hepatitis
IC23	Male	1.8	Natural delivery	Mixed	189.4	110.5	135	321	111	102.7	48.5	3.2	-
IC24	Male	1.4	Natural delivery	Breastfeeding	57.2	51.1	140	128	42	47.1	54.3	2.69	Cytomegalovirus hepatitis
IC25	Male	1.5	Natural delivery	Breastfeeding	146.6	141.1	106	96	159	59.4	61.2	3.8	-
IC26	Male	2.3	Cesarean section	Breastfeeding	6	4.1	332	241	56	157.8	66.6	2.89	-
IC27	Male	1.9	Natural delivery	Breastfeeding	19.8	9.9	546	564	147	78.2	51.1	3.35	Cytomegalovirus hepatitis
IC28	Female	6	Natural delivery	Breastfeeding	37.2	28.5	1170	990	154	21	56.4	2.97	Cytomegalovirus hepatitis
IC29	Male	3	Cesarean section	Breastfeeding	91.7	90.6	287	304	247	159.1	71.3	2.68	-
IC30	Male	3.1	Cesarean section	Breastfeeding	102.1	91.4	99	176	167	50.2	56.1	4.1	-
IC31	Female	2.5	Natural delivery	Breastfeeding	30.4	25.3	616	1035	167	263.5	53.9	3.21	-
IC32	Male	1	Natural delivery	Breastfeeding	35.6	32.3	61	49	52	43.1	48.9	2.76	-
IC33	Female	2.1	Cesarean section	Breastfeeding	111.9	101.2	54	49	50	58	47	2.01	-
IC34	Male	4	Cesarean section	Breastfeeding	17.2	15.4	679	2396	167.7	245	64.9	2.4	-
IC35	Female	1.6	Cesarean section	Breastfeeding	146.4	123	100	244	115.4	249	57.2	5.54	Biliary atresia
IC36	Male	1.1	Cesarean section	Breastfeeding	27.4	20.9	241	178	78.8	1416	69	4.74	-
IC37	Female	3	Cesarean section	Breastfeeding	92.3	68.9	72	62.5	390	14.9	70.9	1.7	-
IC38	Male	1.1	Natural delivery	Breastfeeding	161.4	49.2	6	23	129	43.6	55.6	4.1	-
IC39	Male	2.4	Cesarean section	Breastfeeding	266	220	807	328	38	114.7	51.37	3.35	Biliary atresia
IC40	Female	1.6	Natural delivery	Breastfeeding	37.4	35.8	111	144	573	136.7	60.1	2.8
IC41	Female	1.7	Cesarean section	Breastfeeding	155.9	136.5	75	147	507	123.8	67	3.9	Biliary atresia
IC42	Male	1	Cesarean section	Formula feeding	36.9	31.1	342	491	510	94.7	64	2.9	-
IC43	Male	2	Cesarean section	Breastfeeding	188.4	174.3	336	213	256	140.3	58	3.5	-
H1	Male	6	Natural delivery	Breastfeeding	6.78	2.56	14	20	15	6.3	69.74	3.97	-
H2	Female	30	Natural delivery	Breastfeeding	5.96	2.1	9	18	14	3.1	69.87	3.88	-
H3	Male	12	Natural delivery	Breastfeeding	5.05	2.13	18	21	19	4.9	64.87	4.36	-
H4	Male	12	Natural delivery	Mixed	5.98	2.27	11	23	26	6.7	73.57	4.12	-
H5	Male	12	Cesarean section	Formula feeding	4.68	2.04	16	24	16	8	69.21	3.78	-
H6	Male	7	Cesarean section	Mixed	6.77	2.41	14	19	29	4.1	64.29	3.91	-
H7	Male	11	Cesarean section	Breastfeeding	8.4	2.87	18	30	22	13	69.24	4.1	-
H8	Male	4	Cesarean section	Breastfeeding	6.04	2.15	11	23	13	4.9	61.31	5.31	-
H9	Female	16	Natural delivery	Breastfeeding	5.05	2.37	15	28	21	9.2	70.15	3.64	-
H10	Male	12	Natural delivery	Breastfeeding	4.55	2.06	9	19	17	3.4	65.29	3.98	-
H11	Male	12	Natural delivery	Breastfeeding	5.9	2.29	13	27	14	6.1	64.73	4.27	-
H12	Male	2	Natural delivery	Breastfeeding	8.2	3.04	15	20	20	5.8	60.27	4.92	-
H13	Female	4	Natural delivery	Breastfeeding	9.31	4.23	13	21	15	2.9	69.36	5.3	-
H14	Female	1	Natural delivery	Mixed	16.22	4.52	17	24	12	4.3	59.87	3.92	-
H15	Male	20	Natural delivery	Breastfeeding	7.14	2.47	10	18	16	6.1	68.27	4.33	-
H16	Male	22	Natural delivery	Mixed	5.38	2.51	14	29	23	4.8	63.56	3.87	-
H17	Female	30	Natural delivery	Breastfeeding	4.67	2.16	17	26	16	7.5	69.31	4.76	-
H18	Female	10	Natural delivery	Mixed	4.45	2.24	8	16	9	3.5	63.93	4.03	-
H19	Female	1	Cesarean section	Mixed	20.5	6.21	14	21	12	4.2	60.31	4.69	-
H20	Female	2	Cesarean section	Breastfeeding	19.5	5.92	12	26	15	4.5	57.98	3.95	-
H21	Male	3	Natural delivery	Breastfeeding	9.53	4.67	16	25	20	6.7	64.81	3.9	-
H22	Female	2	Natural delivery	Breastfeeding	10.96	3.12	10	21	18	7.3	61.22	4.35	-
H23	Male	31	Natural delivery	Mixed	12.3	4.2	11	24	16	4.5	64.5	4.5	-
H24	Female	27	Natural delivery	Mixed	4.06	2.04	16	29	12	5.1	76.93	5.07	-
H25	Female	7	Natural delivery	Breastfeeding	7.9	2.9	14	26	20	4.8	67.82	4.87	-
H26	Female	6	Natural delivery	Breastfeeding	5.45	2.19	19	31	17	6.8	64.89	4.39	-
H27	Male	8	Natural delivery	Breastfeeding	10.78	4.2	7	18	11	5.5	69.34	3.95	-
H28	Male	8	Natural delivery	Breastfeeding	19.56	5.03	21	30	25	6.2	59.34	3.79	-
H29	Male	14	Natural delivery	Breastfeeding	12.4	4.05	11	26	15	4.3	64.23	4.64	-
H30	Male	10	Natural delivery	Breastfeeding	9.6	2.18	19	28	16	7.1	66.59	5.21	-
H31	Male	12	Natural delivery	Breastfeeding	5.43	2.07	16	32	22	6.8	65.39	3.88	-
H32	Male	31	Natural delivery	Mixed	7.3	3.2	17	26	15	4	61.2	4.2	-
H33	Male	16	Natural delivery	Breastfeeding	4.49	2.08	18	27	11	14.2	70.2	4.68	-
H34	Female	16	Natural delivery	Breastfeeding	6.3	2.79	21	28	16	5.3	77.34	4.32	-
H35	Male	9	Natural delivery	Formula feeding	7.39	3.56	18	25	14	3.3	62.31	4.51	-
H36	Male	12	Natural delivery	Breastfeeding	10.5	4.5	8	24	15	3.2	59.1	4.12	-
H37	Female	7	Natural delivery	Mixed	5.94	2.5	19	25	18	4.6	60.61	3.82	-
Note: TBA: total bile acids; TBIL: total bilirubin; DBIL: direct bilirubin; TP: total protein; CHOL: total cholesterol; ALT: serum alanine aminotransferase; AST: aspartate aminotransferase; GGT: γ-glutamyl transpeptidase.
