# Supplementary material for: Alterations of Gut Microbiota in Cholestatic Infants and Their Correlation With Hepatic Function
Source: Front Microbiol. 2018 Nov 13;9:2682. doi: 10.3389/fmicb.2018.02682 (PMC6243132; doi:10.3389/fmicb.2018.02682)
Supplement: TABLE S2 — PERMANOVA ranking associations between GM and indicators of hepatic function. [file Table_2.XLSX]

## Sheet: Table2
PERMANOVA ranking associations between GM and indicators of hepatic function
Phenotype	Degree of freedom	R2	P-value
Gender	1	0.02307	0.066
Age	1	0.00535	0.919
Delivery Pattern	1	0.01354	0.365
Feeding Pattern	1	0.05886	0.009	**
TBIL	1	0.01604	0.737
DBIL	1	0.01328	0.839
ALT	1	0.03281	0.163
AST	1	0.0223	0.463
GGT	1	0.05221	0.03
TBA	1	0.01904	0.632
TP	1	0.03032	0.271
CHOL	3	0.00305	1
TBA: total bile acids; TBIL: total bilirubin; DBIL: direct bilirubin; TP: total protein; CHOL: total cholesterol; ALT: serum alanine aminotransferase; AST: aspartate aminotransferase; GGT: γ-glutamyl transpeptidase.
